# Supplementary material for: PSMC2/E2F1 Axis Promotes the Development and Progression of Glioma
Source: Research Square preprint supplement (doi:10.21203/rs.3.rs-141267/v1), 2021-01-11
Supplement: Supplementary file 1 [file 0ad032be0d5c2770ba985d9d.docx]

Table S1 Primers used in qRT-PCR

| Primer Name | Upstream Primer  Sequence (5’-3’) | Downstream Primer  Sequence (5’-3’) |
| --- | --- | --- |
|  |  |  |
| PSMC2 | CAGCACTCTGGGATTTGGCT | TTTCTATCCACGCCCACTCTC |
| GAPDH | TGACTTCAACAGCGACACCCA | CACCCTGTTGCTGTAGCCAAA |
| BARD1 | ATCCTCAGTAGAAAGCCCAAGC | TCAGAATCGGGTCTCGCATG |
| CHEK1 | TTGGCTTGGCAACAGTATTTCG | CCAGCGAGCATTGCAGTAAGT |
| FANCE | GGAAACGCAGAAAGGACTCAG | CCTCTTCCCAACACCGTAATC |
| FANCB | TGATAGCTTGGTTGTTGGAGTG | AAGTATGGTGCTGGGAAAGGA |
| FANCD2 | GGCTTGACAGAGTTGTGGATG | TAGGATCTCAGGTAGGCTGGTG |
| BRCA1 | TGGCAACATACCATCTTCAACC | TGTCAATTCTGGCTTCTCCCT |
| E2F8 | TGACGAAGTGGCAGAGGAAC | CATCATAATCTGCTCGGCGTA |
| RAD51 | CAGTGATGTCCTGGATAATGTAGC | TGTTCTGTAAAGGGCGGTGG |
| FANCG | TTGCTCAGCCGCACATCAT | TGGCAGTTCCTTGGTTCCTT |
| PLK1 | AGAGGAGGAAAGCCCTGACT | TAACTCGGTTTCGGTGCAGG |
| RFC4 | TCAGGAAGTCGCTCAGATGG | CAGAATCGGGTGGTTTTCG |
| E2F1 | CACTTTCGGCCCTTTTGCTC | GTGCTCTCACCGTCCTACAC |
| BRCA2 | CGATTGGTCAGGTAGACAGCA | CAGAATAAAAGCCCCTAAACCC |
| FANCA | GTTTGAGCATACGGGGAACA | TGGCAGTAGGTGGAGTACAGAG |
| NEK2 | GAAGGAATGCCACAGACGAAGT | CAAGCAGCCCAATGACCAGATA |
| BIRC5 | TCTCAAGGACCACCGCATCT | TTTGAGGAAACTGCGGAGAA |
| KIF2C | AGATGGAAGCCTGCTCTAACGG | GCTGGACATCTGGGAAGACAGT |
| DEPDC1A | CTGAAGTGACCCGCAAACAAA | CTGGTGGGAGATCATTCCATTC |
| PSMA1 | CAGCCACAGTTGGTCTGAAATC | CACAGGCAGTGGTCTATCGAATA |
| PSMC4 | AAAGCATCCCGCTGGTCAT | CGCACATAATAGTTGGAGCCTGT |

Table S2 Antibodies used in western blot and IHC

| Primary antibodies | Dilution in WB | Source species | Company | Catalog No. |
| --- | --- | --- | --- | --- |
| PSMC2 | 1:1000 | Mouse | Santa cruz | SC-166972 |
| GAPDH | 1:3000 | Rabbit | Bioworld | AP0063 |
| E2F1 | 1:1000 | Rabbit | abcam | ab179445 |
| BIRC5 | 1:2000 | Rabbit | abcam | ab469 |
| BRCA1 | 1:2000 | Rabbit | abcam | ab191042 |
| NEK2 | 1:500 | Rabbit | abcam | ab115731 |
| PLK1 | 1:1000 | Mouse | abcam | ab17057 |
| Primary antibodies | Dilution in IHC | Source species | Company | Catalog No. |
| PSMC2 | 1:100 | Mouse | Santa cruz | SC-166972 |
| Ki67 | 1:200 | Rabbit | abcam | ab16667 |
| E2F1 | 1:100 | Rabbit | Abcam | ab179445 |
| Secondary antibody | Dilution |  | Company | Catalog No. |
| HRP Goat Anti-Rabbit IgG (WB) | 1:3000 |  | Beyotime | A0208 |
| HRP Goat Anti-Rabbit IgG (IHC) | 1:200 |  | Abcam | Ab111909 |

**
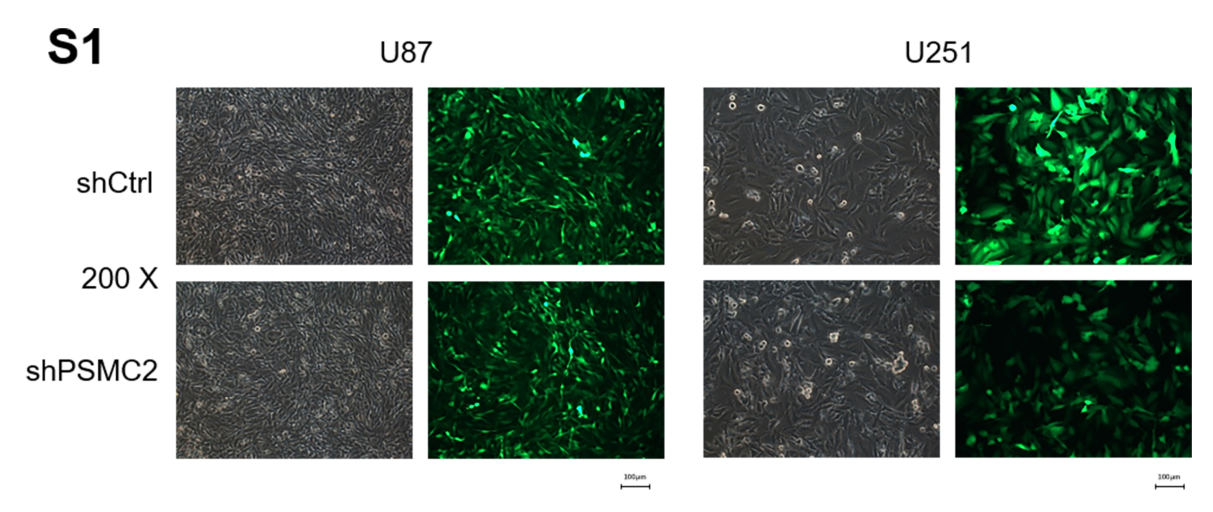
**

**Figure S1.** The transfection efficiencies of shPSMC2 and shCtrl in U87 and U251 cells were evaluated through observing the fluorescence of GFP on lentivirus vector (scale bar =100 μm).


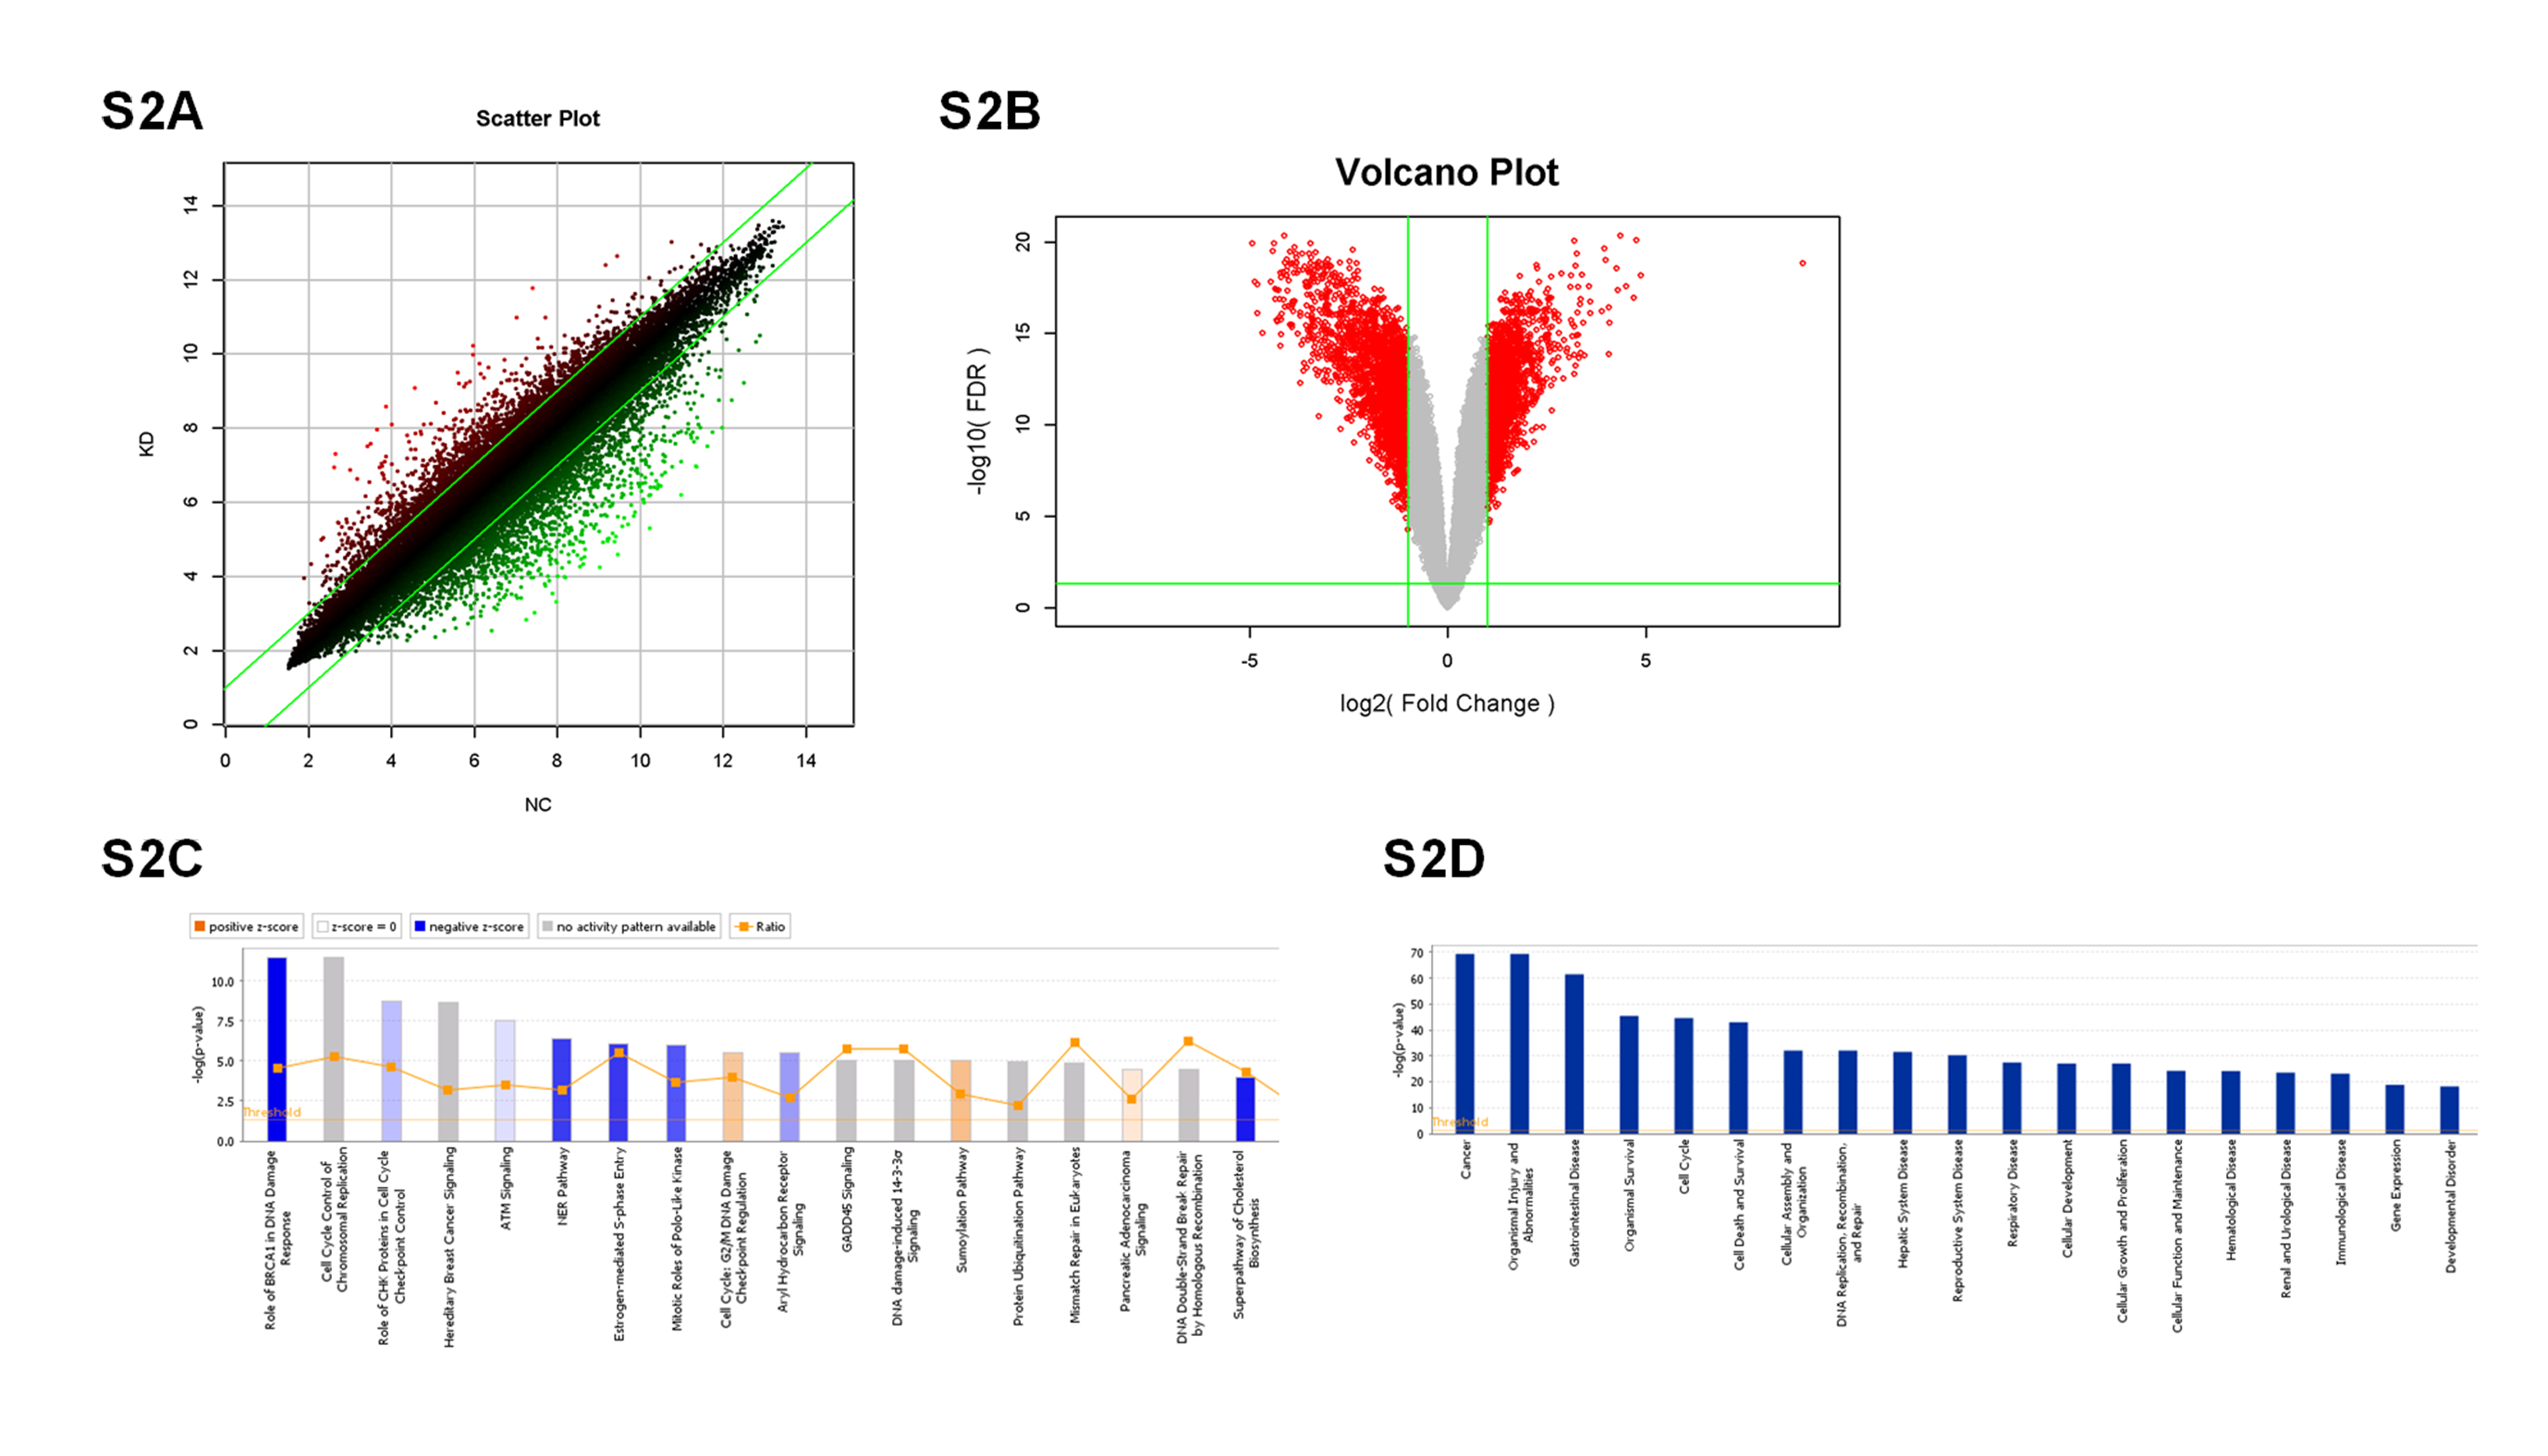


**Figure S2.** (A) The scatter plot of gene expression profiling in U251 cells with or without PSMC2 knockdown. Red dots represented significantly upregulated DEGs. Blue dots represented significantly downregulated DEGs. (B) The volcano plot of gene expression profiling in U251 cells with or without PSMC2 knockdown. (C) The enrichment of the DEGs in canonical signaling pathways was analyzed by IPA. (D) The enrichment of the DEGs in IPA disease and function was analyzed by IPA.

**
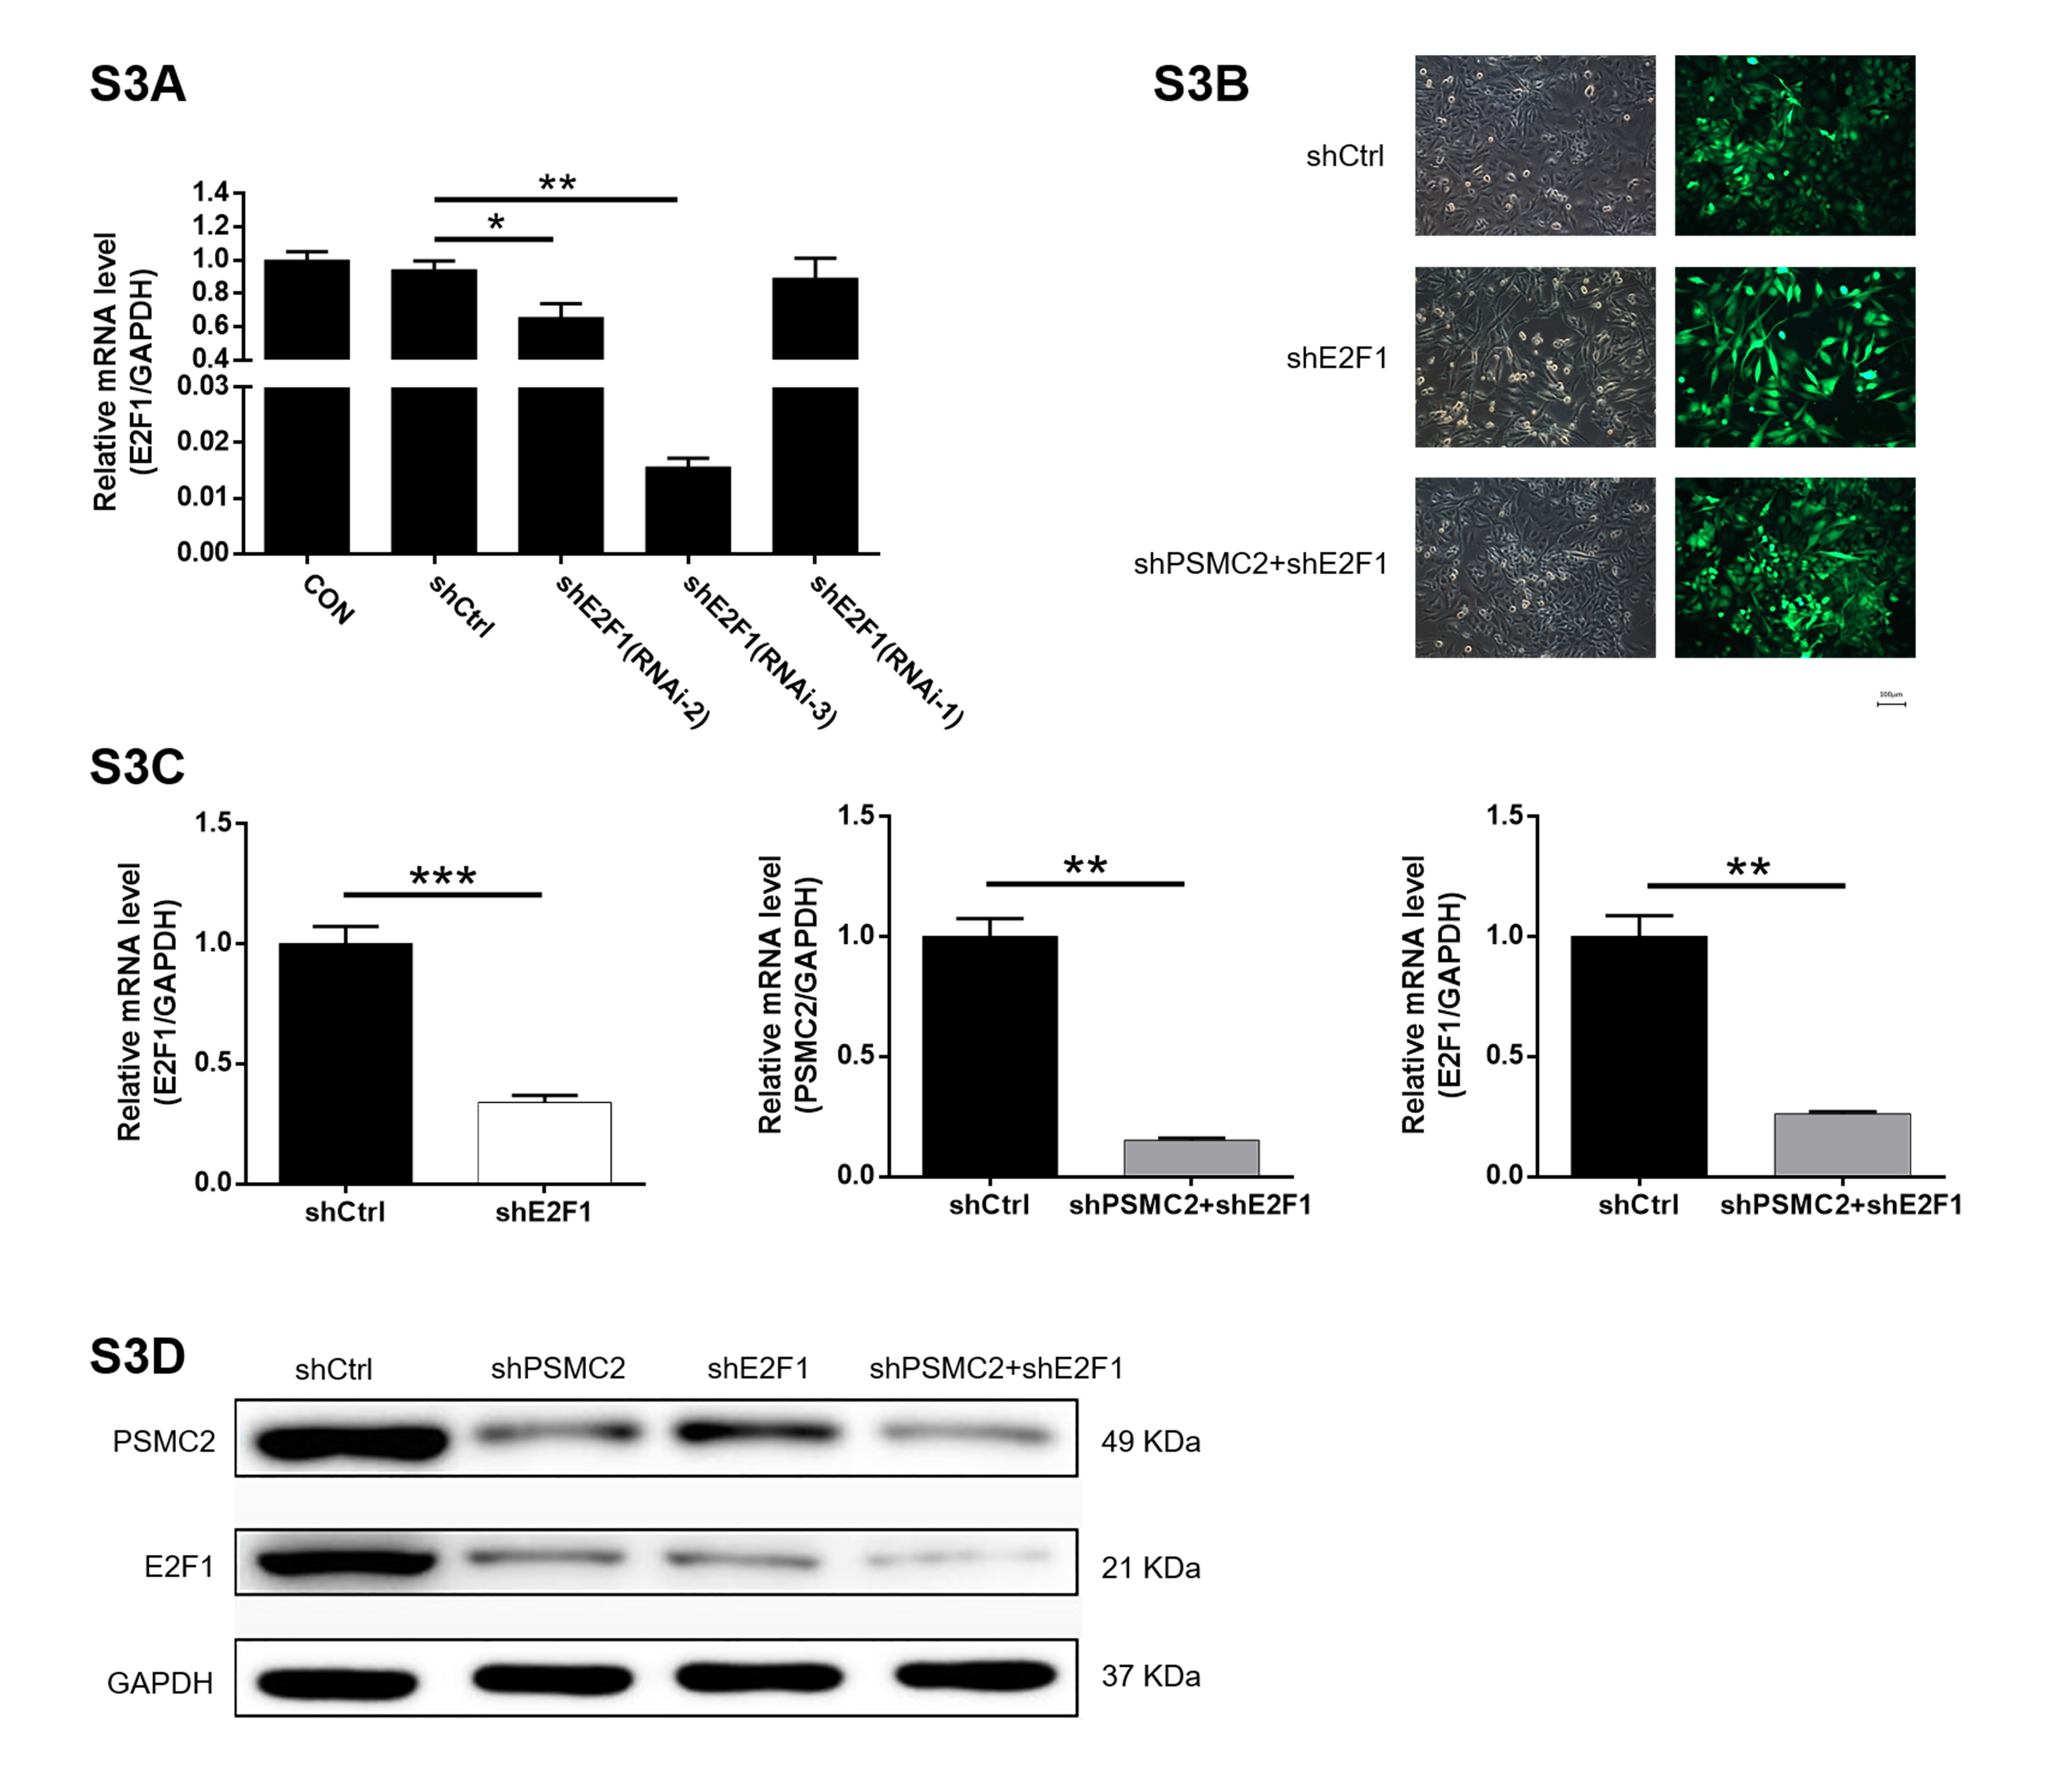
**

**Figure S3.** (A) The knockdown efficiencies of 3 shRNAs designed for E2F1 knockdown were evaluated by qPCR. Data was shown as mean ± SD. ****P* < 0.001. (B) The transfection efficiencies of shCtrl, shE2F1, shPSMC2+shE2F1 in U251 cells were evaluated through observing the fluorescence of GFP on lentivirus vector (scale bar =100 μm). (C, D) The knockdown efficiencies of shCtrl, shE2F1, shPSMC2+shE2F1 in U251 cells were accessed by PCR (C) and (D) WB analysis.

Data was shown as mean ± SD. **P* < 0.05, ***P* < 0.01
